# Supplementary material for: Optimization and action mechanism of pollutant removal performance of unsaturated vertical flow constructed wetland (UVFCW) driven by substained-release carbon source
Source: PeerJ. 2025 Jan 16;13:e18819. doi: 10.7717/peerj.18819 (PMC11742248; doi:10.7717/peerj.18819)
Supplement: Supplemental Information 1 [file peerj-13-18819-s001.xls]

## Sheet: Sheet1
		Figure 2 Effluent water quality along with operation time
	COD	Time	CWR con（mg/L）	CWR rem（%）	CWR-Cu con（mg/L）	CWR-Cu rem（%）	CWR-Ca con（mg/L）	CWR-Ca rem（%）	CWR-Cb con（mg/L）	CWR-Cb rem（%）
		3	24.04	63.76	123.21	-85.74	163.21	-146.04	78.95	-19.03
		6	24.04	62.76	95.29	-47.6	104.88	-62.44	68.21	-5.65
		9	20.71	61.23	167.79	-214.12	104.04	-94.77	67.79	-26.91
		12	11.54	74.9	74.88	-62.82	75.71	-64.63	77.79	-69.16
		15	17.79	66.16	72.38	-37.64	44.04	16.24	49.04	6.74
		18	14.04	60.06	71.96	-48.36	44.46	3.12	30.71	28.86
		21	10.71	70.36	66.54	-84.2	64.88	-79.58	32.38	10.38
		24	23.21	27.69	76.13	-137.17	54.04	-68.37	33.63	-4.76
		27	19.04	46.67	107.38	-200.7	61.13	-71.18	43.63	-22.17
		30	16.96	55.13	94.46	-149.94	39.88	-5.51	39.46	-4.41
		33	14.88	64.9	119.46	-181.91	67.79	-59.98	40.71	3.93
		36	21.13	71.09	69.46	4.94	46.96	35.73	80.29	-9.88
		39	28.63	59.99	60.29	15.73	49.88	30.29	25.29	64.65
		42	24.04	62.7	54.46	15.51	29.88	53.65	22.38	65.29
		45	11.54	79.38	45.53	18.67	37.25	33.45	31.77	43.24
		48	15	70.14	64.55	-28.51	62.27	-23.98	34.09	32.13
		51	19.32	47.64	73.86	-100.21	44.32	-20.12	32.95	10.68
		54	9.77	79.19	96.59	-105.65	29.77	36.61	32.5	30.81
		57	4.32	87.74	88.41	-150.97	26.64	24.38	12.5	64.52
		60	20.23	18.84	36.59	-46.81	30.23	-21.28	32.66	-31.05
		63	20.68	34.84	77.05	-142.72	51.59	-62.53	46.59	-46.78
		66	3.86	91.19	29.32	33.16	25.68	41.45	22.96	47.65
		69	10.91	80.65	57.73	-2.42	44.55	20.97	27.73	50.81
		72	10.68	75.9	47.5	-7.18	46.14	-4.1	29.56	33.3
		75	8.86	80.4	45.68	-1.01	42.95	5.03	32.2	28.81
	NH4+-N	Time	CWR con（mg/L）	CWR rem（%）	CWR-Cu con（mg/L）	CWR-Cu rem（%）	CWR-Ca con（mg/L）	CWR-Ca rem（%）	CWR-Cb con（mg/L）	CWR-Cb rem（%）
		3	2.09	50.37	1.23	70.78	1.68	60.07	1.08	74.29
		6	2.69	38.5	1.03	76.43	0.93	78.69	0.76	82.54
		9	3.42	23.8	1.56	65.14	1.8	59.82	1.07	76.1
		12	0.47	85.18	0.67	78.94	0.81	74.49	0.74	76.72
		15	0.51	85.64	0.75	78.92	0.93	73.77	0.54	84.85
		18	0.3	90.23	0.61	80.13	0.37	87.93	0.23	92.52
		21	0.09	97.47	0.67	81.03	0.55	84.24	0.27	92.26
		24	0.12	97.18	0.96	76.79	0.64	84.61	0.33	92.08
		27	0.12	97.44	1.04	77.11	0.69	84.81	0.47	89.74
		30	0.06	98.24	1.2	65.08	0.4	88.42	0.24	92.92
		33	0.05	99.03	0.9	81.03	0.69	85.46	0.37	92.24
		36	0	100	0.54	88.96	0.38	92.13	0.27	94.43
		39	0.24	95.44	0.93	82.13	0.36	92.99	0.24	95.44
		42	0.06	98.63	0.61	86.19	0.3	93.21	0.1	97.67
		45	0	100	1.14	77.81	0.39	92.37	0.33	93.46
		48	0	100	0.68	68.66	0.51	76.32	0.11	95.13
		51	0	100	0.49	88.22	0.25	94.02	0.07	98.37
		54	0	100	0.35	94.22	0.11	98.15	0	100
		57	0	100	0.23	94.58	0.23	94.58	0	100
		60	0	100	0.07	98.35	0.08	97.99	0	100
		63	0	100	0.2	95.12	0.07	98.37	0	100
		66	0	100	0.6	86.35	0.32	92.83	0.57	87.03
		69	0	100	0.55	88.47	0.25	94.79	0.01	99.84
		72	0	100	0.25	93.52	0.32	91.55	0	100
		75	0	100	0.82	80.71	0.54	87.43	0	100
	NO3--N	Time	CWR con（mg/L）	CWR rem（%）	CWR-Cu con（mg/L）	CWR-Cu rem（%）	CWR-Ca con（mg/L）	CWR-Ca rem（%）	CWR-Cb con（mg/L）	CWR-Cb rem（%）
		3	12.2	-22.01	1.76	82.43	2	79.98	2.43	75.7
		6	12.32	-23.2	0.8	92.01	2.2	78.01	2.38	76.23
		9	12.71	-27.14	0.38	96.18	1.5	84.97	1.23	87.73
		12	14.39	-43.95	1.1	89.04	2.03	79.68	2.46	75.36
		15	13.89	-38.93	0.79	92.13	2.72	72.83	6.1	39.04
		18	15.59	-55.91	1.08	89.16	1.65	83.54	5.1	48.97
		21	16.16	-61.64	0.95	90.51	0.9	91.04	2.48	75.22
		24	13.57	-35.72	0.79	92.09	0.49	95.12	2.96	70.4
		27	13.63	-36.31	0.33	96.65	0.58	94.21	2.81	71.9
		30	13.62	-36.19	0.49	95.07	0.93	90.67	2.37	76.31
		33	14.3	-42.98	0.41	95.93	0.66	93.43	3.65	63.48
		36	16	-59.98	0.93	90.71	1.2	87.99	5.98	40.19
		39	13.99	-39.86	0.31	96.87	0.93	90.66	7.57	24.33
		42	18.66	-86.58	1	90.04	4.08	59.16	11.3	-12.97
		45	18.11	-81.12	3.21	67.92	5.23	47.74	9.32	6.77
		48	16.66	-66.57	6.38	36.23	3.74	62.57	6.67	33.34
		51	12.25	-22.46	2.27	77.27	1.73	82.68	2.66	73.4
		54	8.98	10.2	0.94	90.62	2.01	79.85	1.68	83.17
		57	11.69	-16.9	1.11	88.88	3	69.95	3.92	60.8
		60	11.16	-11.57	1.04	89.62	1.38	86.22	5.01	49.93
		63	9.91	0.87	1.01	89.91	4.37	56.3	6.71	32.87
		66	11.61	-16.1	2.15	78.53	4.9	50.96	5.87	41.26
		69	13.14	-31.39	0.62	93.83	1.27	87.34	9.01	9.92
		72	12.06	-20.59	0.92	90.77	2.03	79.7	7.38	26.16
		75	11.51	-15.08	0.36	96.41	1.05	89.54	7.72	22.78
	TN	Time	CWR con（mg/L）	CWR rem（%）	CWR-Cu con（mg/L）	CWR-Cu rem（%）	CWR-Ca con（mg/L）	CWR-Ca rem（%）	CWR-Cb con（mg/L）	CWR-Cb rem（%）
		3	14.29	19.31	2.98	83.14	3.68	79.22	3.51	80.18
		6	15.01	14.05	1.83	89.52	3.13	82.07	3.14	82.01
		9	16.14	4.74	1.95	88.5	3.31	80.47	2.3	86.42
		12	14.86	4.47	1.76	88.68	2.84	81.76	3.2	79.43
		15	14.4	11.25	1.54	90.53	3.65	77.51	6.63	59.12
		18	15.89	4.94	1.69	89.87	2.02	87.94	5.33	68.1
		21	16.25	-0.3	1.61	90.04	1.45	91.06	2.75	83.03
		24	13.69	8.2	1.75	88.25	1.13	92.45	3.29	77.95
		27	13.75	14.83	1.38	91.45	1.27	92.12	3.28	79.69
		30	13.68	15.99	1.69	89.6	1.33	91.83	2.61	83.95
		33	14.34	22.06	1.31	92.88	1.35	92.66	4.02	78.15
		36	16	16.52	1.47	92.34	1.59	91.73	6.25	67.37
		39	14.22	22.19	1.24	93.23	1.3	92.91	7.8	57.31
		42	18.72	9.57	1.6	92.25	4.38	78.82	11.4	44.93
		45	18.11	6.01	4.34	77.45	5.62	70.85	9.66	49.88
		48	16.66	14.8	7.06	63.91	4.26	78.23	6.77	65.37
		51	12.25	12.59	2.76	80.28	1.98	85.86	2.73	80.53
		54	8.98	21.53	1.29	88.71	2.13	81.41	1.68	85.29
		57	11.69	8.89	1.35	89.51	3.24	74.76	3.92	69.45
		60	11.16	3.63	1.11	90.45	1.46	87.38	5.01	56.75
		63	9.91	14.69	1.21	89.57	4.44	61.8	6.71	42.22
		66	11.61	12.7	2.75	79.32	5.22	60.75	6.45	51.52
		69	13.14	1.66	1.17	91.26	1.51	88.67	9.02	32.53
		72	12.06	7.8	1.17	91.04	2.35	82	7.38	43.54
		75	11.51	12.97	1.18	91.07	1.58	88.04	7.72	41.6
	TP	Time	CWR con（mg/L）	CWR rem（%）	CWR-Cu con（mg/L）	CWR-Cu rem（%）	CWR-Ca con（mg/L）	CWR-Ca rem（%）	CWR-Cb con（mg/L）	CWR-Cb rem（%）
		3	0.03	90.26	0.17	51.92	0.38	-8.79	0.1	71.43
		6	0.04	91.08	0.11	74.75	0.24	45.85	0.06	86.06
		9	0.17	59.38	0.06	85.02	0.11	74.22	0.09	78.27
		12	0.15	66	0.11	73.82	0.21	50.37	0.38	12.59
		15	0.23	46.34	0.12	71.15	0.19	55.48	0.2	52.87
		18	0.26	46.13	0.13	72.44	0.23	52.99	0.16	66.72
		21	0.49	7.77	0.23	56.48	0.34	35.3	0.2	62.83
		24	0.32	42.55	0.27	51.42	0.22	61.17	0.28	50.53
		27	0.4	27.54	0.21	61.14	0.31	42.98	0.34	37.53
		30	0.34	43.05	0.28	53.81	0.27	54.64	0.33	45.53
		33	0.67	3.6	0.3	56.92	0.46	33.14	0.47	32.42
		36	0.36	55.05	0.23	71.11	0.27	66.78	0.37	53.82
		39	0.46	39.34	0.28	64.04	0.36	52.99	0.39	49.09
		42	0.52	27.53	0.34	52.31	0.34	52.31	0.4	44.74
		45	0.49	39.59	0.43	46.91	0.58	28.4	0.48	40.82
		48	0.54	29.55	0.36	53.57	0.45	41.23	0.42	45.78
		51	0.55	38.1	0.55	38.1	0.52	41.46	0.34	62.18
		54	0.47	38.64	0.19	75.46	0.41	47.04	0.29	61.89
		57	0.25	48.98	0.09	81.63	0.21	57.14	0.23	52.04
		60	0.29	36.41	0.08	83.15	0.16	64.67	0.25	45.65
		63	0.39	6.44	0.11	72.84	0.16	60.76	0.23	43.86
		66	0.27	52.86	0.16	71.37	0.2	65.2	0.24	57.27
		69	0.17	65.99	0.09	82.23	0.09	81.22	0.24	51.78
		72	0.18	59.67	0.07	83.98	0.18	59.67	0.21	54.14
		75	0.26	48.24	0.1	79.4	0.16	68.34	0.16	68.26
