# Supplementary material for: Optimization and action mechanism of pollutant removal performance of unsaturated vertical flow constructed wetland (UVFCW) driven by substained-release carbon source
Source: PeerJ. 2025 Jan 16;13:e18819. doi: 10.7717/peerj.18819 (PMC11742248; doi:10.7717/peerj.18819)
Supplement: Supplemental Information 2 [file peerj-13-18819-s002.xls]

## Sheet: Sheet1
			Figure 3 Water quality changes along with water flow direction
	DO	Depth(cm)	CWR con（mg/L）	CWR σ	CWR-Cu con（mg/L）	CWR-Cu σ	CWR-Ca con（mg/L）	CWR-Ca σ	CWR-Cb con（mg/L）	CWR-Cb σ
		50	3.7	0.19	0.6	0.15	0.83	0.26	3.39	0.22
		60	3.56	0.15	0.37	0.13	0.6	0.29	2.59	0.2
		70	3.44	0.16	0.31	0.09	0.47	0.3	2.25	0.08
		80	3.44	0.26	0.15	0.09	0.15	0.13	1.85	0.2
	COD	Depth(cm)	CWR con（mg/L）	CWR conσ	CWR rem（%）	CWR remσ	CWR-Cu con（mg/L）	CWR-Cu conσ	CWR-Cu rem（%）	CWR-Cu remσ	CWR-Ca con（mg/L）	CWR-Ca conσ	CWR-Ca rem（%）	CWR-Ca remσ	CWR-Cb con（mg/L）	CWR-Cb conσ	CWR-Cb rem（%）	CWR-Cb remσ
		50	9.39	5.18	30.3	2	223.03	16.8	9.09	5.2	80.38	3	36.58	1.8	-362.8	30	80.55	12.33
		60	5.91	1.59	32.88	3.81	26.67	8.26	12.12	1.82	87.96	1.99	31.31	3	45.95	2	75.06	2.05
		70	7.27	6.96	46.52	6.24	23.03	3.55	141.67	8	83.92	6	3.81	0.2	52.06	2	-194.73	21
		80	10.15	1.12	50.3	6.49	44.55	1.59	29.83	2.25	78.98	2.67	-3.53	0.3	7.3	0.8	37.64	1
	NH4+-N	Depth(cm)	CWR con（mg/L）	CWR conσ	CWR rem（%）	CWR remσ	CWR-Cu con（mg/L）	CWR-Cu conσ	CWR-Cu rem（%）	CWR-Cu remσ	CWR-Ca con（mg/L）	CWR-Ca conσ	CWR-Ca rem（%）	CWR-Ca remσ	CWR-Cb con（mg/L）	CWR-Cb conσ	CWR-Cb rem（%）	CWR-Cb remσ
		50	0	0	0.02	0.02	0.96	0.04	0	0	100	0	99.54	0.41	77.42	2.09	100	0
		60	0	0	0.19	0.05	0.02	0.03	0	0	100	0	95.49	1.6	99.63	0.64	100	0
		70	0	0	0.3	0.08	0	0	0.48	0.1	100	0	93.06	1.32	100	0	88.74	2.52
		80	0	0	0.54	0.29	0.37	0.15	0	0	100	0	87.56	6.45	91.26	3.69	99.95	0.09
	NO3--N	Depth(cm)	CWR con（mg/L）	CWR conσ	CWR rem（%）	CWR remσ	CWR-Cu con（mg/L）	CWR-Cu conσ	CWR-Cu rem（%）	CWR-Cu remσ	CWR-Ca con（mg/L）	CWR-Ca conσ	CWR-Ca rem（%）	CWR-Ca remσ	CWR-Cb con（mg/L）	CWR-Cb conσ	CWR-Cb rem（%）	CWR-Cb remσ
		50	11.35	0.8	3.79	0.5	4.32	0.4	11.6	0.2	-13.51	0.3	62.1	4.9	56.77	8	-15.99	1
		60	11.6	0.4	2.16	0.7	8.21	0.3	11.43	0.4	-16	0.4	78.36	7	17.9	1	-14.33	1
		70	11.65	0.9	0.9	0.2	6.67	0.1	5.97	0.6	-16.53	0.2	91.05	8	33.34	2	40.27	6
		80	12.24	0.5	0.63	0.3	1.45	0.2	8.04	0.2	-22.35	0.8	93.67	8	85.53	9	19.62	2
	TN	Depth(cm)	CWR con（mg/L）	CWR conσ	CWR rem（%）	CWR remσ	CWR-Cu con（mg/L）	CWR-Cu conσ	CWR-Cu rem（%）	CWR-Cu remσ	CWR-Ca con（mg/L）	CWR-Ca conσ	CWR-Ca rem（%）	CWR-Ca remσ	CWR-Cb con（mg/L）	CWR-Cb conσ	CWR-Cb rem（%）	CWR-Cb remσ
		50	11.35	0.53	3.81	0.19	5.29	0.34	11.6	0.06	14.15	3.73	71.17	1.75	60.01	2.72	12.27	1.14
		60	11.6	0.64	2.35	0.17	8.23	0.56	11.43	0.25	12.28	4.41	82.2	1.44	37.75	4.57	13.53	1.88
		70	11.65	0.82	1.19	0.11	6.67	0.69	6.45	0.64	11.87	5.83	90.96	0.92	49.55	5.67	51.17	5.24
		80	12.24	0.83	1.17	0.01	1.82	0.47	8.04	0.86	7.48	1	91.12	0.12	86.24	3.68	39.23	5.88
	TP	Depth(cm)	CWR con（mg/L）	CWR conσ	CWR rem（%）	CWR remσ	CWR-Cu con（mg/L）	CWR-Cu conσ	CWR-Cu rem（%）	CWR-Cu remσ	CWR-Ca con（mg/L）	CWR-Ca conσ	CWR-Ca rem（%）	CWR-Ca remσ	CWR-Cb con（mg/L）	CWR-Cb conσ	CWR-Cb rem（%）	CWR-Cb remσ
		50	0.3	0.03	0.21	0.05	0.35	0.03	0.25	0.02	38.31	4.43	55.21	11.13	27.76	5.45	47.08	3.63
		60	0.24	0.06	0.19	0.03	0.25	0.04	0.22	0.01	49.98	2	61.4	4.69	48.54	7.58	53.6	3.87
		70	0.24	0.04	0.13	0.01	0.18	0.03	0.27	0.05	49.56	7.24	73.09	3.08	61.98	5.69	44.93	8.59
		80	0.2	0.05	0.09	0.01	0.14	0.05	0.2	0.04	57.97	9	81.87	2.31	69.74	5	58.06	8.91
	pH	Depth(cm)	CWR pH（mg/L）	CWR pHσ	CWR-Cu pH	CWR-Cu pHσ	CWR-Ca pH	CWR-Ca pHσ	CWR-Cb pH	CWR-Cb pHσ
		50	7.485	0.0648194	7.50133	0.07498	7.51733	0.0481989	7.54933	0.0204015
		60	7.37633	0.140509	7.432	0.0875608	7.46433	0.122687	7.471	0.150884
		70	7.097	0.098431	7.21733	0.0663526	7.28867	0.0574329	7.31333	0.0384216
		80	7.334	0.00946338	7.40867	0.0155	7.44433	0.0311377	7.45567	0.0768939
