# Supplementary material for: Optimization and action mechanism of pollutant removal performance of unsaturated vertical flow constructed wetland (UVFCW) driven by substained-release carbon source
Source: PeerJ. 2025 Jan 16;13:e18819. doi: 10.7717/peerj.18819 (PMC11742248; doi:10.7717/peerj.18819)
Supplement: Supplemental Information 3 [file peerj-13-18819-s003.xls]

## Sheet: Sheet1
	String diagram of the relative abundance proportion of phylum-level microorganisms
	Class(phylum)	CWR	CWR-Cu	CWR-Ca-A	CWR-Ca-B	CWR-Cb
	Proteobacteria	0.3666	0.2701	0.1665	0.593	0.1114
	Firmicutes	0.1259	0.1229	0.4376	0.0603	0.5576
	Bacteroidota	0.0389	0.3998	0.1635	0.1054	0.1951
	Actinobacteriota	0.2387	0.0702	0.0114	0.0044	0.0564
	Desulfobacterota	0.0034	0.0397	0.044	0.1257	0.048
	Planctomycetota	0.0055	0.0085	0.0001	0.0052	0.0001
	Acidobacteriota	0.0408	0.0074	0.0057	0.0232	0.0059
	Chloroflexi	0.0552	0.0024	0.0007	0.0025	0.0002
	Patescibacteria	0.011	0.0011	0.1424	0.0098	0.0077
	Myxococcota	0.0301	0.0136	0.0001	0.0048	0.0007
	Accumulation bar diagram of the relative abundance proportion of genus-level microorganisms
	Class(genus)	CWR	CWR-Cu	CWR-Ca-A	CWR-Ca-B	CWR-Cb
	Caproiciproducens	0	0	0.04817	0.00039759	0.14947
	OM190	0.00166	0.00020853	0	0.00161	0
	Enterobacter	0.01377	0.00211	0.02679	0.04996	0.01013
	Massilia	0.00293	0.00045616	0.00149	0.00196	0.00259
	Desulfovibrio	0	0.03121	0.04142	0.03505	0.04782
	WCHB1-32	0	0.03089	0.05666	0.01461	0.04225
	Bacillus	0.12124	0.00065166	0.00038296	0.00013253	0.00031563
	Allorhizobium	0.00083628	0.02256	0.01294	0.05967	0.01274
	Ruminiclostridium	0	0.01385	0.08917	0.00558	0.01247
	Saccharimonadales	0.00242	0.0001564	0.10282	0.00060374	0.00685
	Lentimicrobium	0	0.03084	0.01777	0.03415	0.02852
	Denitratisoma	0	0.00654	0.00090775	0.06227	0.00058392
	Pedobacter	3.745e-05	0.00058649	0.04655	0.00039759	0.05097
	Thauera	0	0.0338	0.0001702	0.0646	0.00022094
	Acidovorax	0.01072	0.01095	0.00136	0.00252	0.00312
	Nitrospira	0.00496	0.00013033	0.00015602	0.0001178	0
	Sporomusa	0	0.00464	0.01806	0.00701	0.05669
	Hydrogenophaga	0.01158	0.02045	0.00356	0.0238	0.00094689
	Dechloromonas	0.00734	0.01409	0.00066663	0.00645	0.0035
	Chryseobacterium	0.00084876	7.82e-05	0.000695	0.0013	0.00208
	Nakamurella	0.00996	0.0003519	0.00026949	0	0
	Hydrogenedensaceae	0.01027	0.00106	0.00053898	0.0042	4.734e-05
	Clostridium	0	0.00013033	0.00749	0.00044176	0.05481
	Christensenellaceae	0	0.02037	0.012	0.00661	0.02339
	Azospirillum	4.993e-05	0.00748	0.01251	0.02767	0.01217
	Clostridium	0	0	0.0094	7.363e-05	0.0506
	Kapabacteriales	0.00288	0.01082	0.01145	0.00801	0.00259
	Bdellovibrio	0.00394	0.00066469	0.00156	0.00362	0.00044188
	Pseudomonas	0.00509	0.01166	0.00099285	0.00361	0.00126
	Azospira	0	0.00033886	0.0183	0.02843	0.00029985
	Others	0.78946	0.72293	0.45576	0.54516	0.42314
